# Supplementary material for: Genetic and Environmental Contributions to Weight, Height, and BMI from Birth to 19 Years of Age: An International Study of Over 12,000 Twin Pairs
Source: PubMed Central journal article supplement (PMC3275599; doi:10.1371/journal.pone.0030153), 2012-02-08
Supplement: pone.0030153.s001.pdf [file pone.0030153.s001.pdf]

Table S1: Sample sizes and characteristics of the cohorts included in the analyses

| Birth Cohort | Age of data collection | N of MZ male twin pairs included | N of MZ female twin pairs included | N MZ Total Same-sex twin pairs included | N DZ Same-sex male twin pairs included | N DZ Same-sex female twin pairs included | N DZ Total Same-sex twin pairs included | N DZ Opposite-sex twin pairs included | N of twin pairs included |
|--------------|------------------------|----------------------------------|------------------------------------|-----------------------------------------|----------------------------------------|------------------------------------------|-----------------------------------------|---------------------------------------|--------------------------|
| <i>QNTS</i>  | Birth                  | 80                               | 86                                 | 166                                     | 60                                     | 54                                       | 111                                     | 111                                   | 388                      |
|              | 5mos                   | 55                               | 68                                 | 123                                     | 51                                     | 48                                       | 99                                      | 81                                    | 303                      |
|              | 5y                     | 80                               | 86                                 | 166                                     | 60                                     | 51                                       | 111                                     | 111                                   | 388                      |
|              | 8y                     | 67                               | 78                                 | 145                                     | 55                                     | 54                                       | 109                                     | 107                                   | 361                      |
| <i>CATSS</i> | Birth                  | 91                               | 81                                 | 172                                     | 96                                     | 71                                       | 167                                     | 173                                   | 512                      |
|              | 9y                     | 80                               | 73                                 | 153                                     | 92                                     | 70                                       | 162                                     | 173                                   | 488                      |
|              | 12y                    | 91                               | 81                                 | 172                                     | 96                                     | 71                                       | 167                                     | 163                                   | 502                      |
| <i>TCHAD</i> | Birth                  | 186                              | 190                                | 376                                     | 131                                    | 138                                      | 169                                     | 278                                   | 823                      |
|              | 8y                     | 186                              | 182                                | 368                                     | 126                                    | 123                                      | 249                                     | 278                                   | 895                      |
|              | 13y                    | 158                              | 160                                | 318                                     | 108                                    | 119                                      | 227                                     | 235                                   | 780                      |
|              | 16y                    | 185                              | 190                                | 375                                     | 131                                    | 138                                      | 269                                     | 275                                   | 919                      |
| <i>DTR</i>   | Birth                  | 76                               | 65                                 | 141                                     | 183                                    | 171                                      | 352                                     | 300                                   | 793                      |
|              | 3y                     | 53                               | 65                                 | 118                                     | 170                                    | 156                                      | 326                                     | 300                                   | 744                      |
|              | 4y                     | 57                               | 64                                 | 121                                     | 181                                    | 171                                      | 352                                     | 286                                   | 759                      |
|              | 5y                     | 69                               | 56                                 | 125                                     | 183                                    | 151                                      | 334                                     | 288                                   | 747                      |
|              | 6y                     | 76                               | 57                                 | 133                                     | 165                                    | 139                                      | 304                                     | 254                                   | 691                      |
|              | 7y                     | 59                               | 60                                 | 119                                     | 152                                    | 148                                      | 300                                     | 288                                   | 707                      |
|              | 8y                     | 44                               | 54                                 | 98                                      | 157                                    | 128                                      | 285                                     | 238                                   | 621                      |
|              | 9y                     | 55                               | 49                                 | 104                                     | 136                                    | 137                                      | 273                                     | 249                                   | 626                      |
|              | 10y                    | 60                               | 45                                 | 105                                     | 121                                    | 139                                      | 260                                     | 212                                   | 577                      |
|              | 11y                    | 44                               | 54                                 | 98                                      | 117                                    | 111                                      | 228                                     | 170                                   | 496                      |
|              | 12y                    | 39                               | 44                                 | 83                                      | 79                                     | 100                                      | 179                                     | 165                                   | 427                      |
|              | 13y                    | 39                               | 32                                 | 71                                      | 83                                     | 93                                       | 176                                     | 119                                   | 366                      |
|              | 14y                    | 41                               | 37                                 | 78                                      | 75                                     | 82                                       | 157                                     | 112                                   | 347                      |
|              | 15y                    | 43                               | 41                                 | 84                                      | 93                                     | 87                                       | 180                                     | 114                                   | 378                      |
|              | 16y                    | 38                               | 42                                 | 80                                      | 61                                     | 56                                       | 117                                     | 94                                    | 291                      |
|              | 17y                    | 31                               | 31                                 | 62                                      | 62                                     | 72                                       | 134                                     | 72                                    | 268                      |
|              | 18y                    | 36                               | 37                                 | 73                                      | 45                                     | 46                                       | 91                                      | 65                                    | 229                      |
|              | 19y                    | 24                               | 26                                 | 50                                      | 36                                     | 44                                       | 80                                      | 74                                    | 204                      |
| <i>MOLE</i>  | Birth                  | 132                              | 130                                | 262                                     | 139                                    | 126                                      | 265                                     | 227                                   | 754                      |
|              | 12y                    | 130                              | 130                                | 260                                     | 139                                    | 126                                      | 265                                     | 227                                   | 752                      |
|              | 14y                    | 132                              | 139                                | 271                                     | 121                                    | 120                                      | 241                                     | 200                                   | 712                      |
| <i>MAPS</i>  | Birth                  | 116                              | 123                                | 239                                     | 85                                     | 82                                       | 167                                     | 170                                   | 576                      |
|              | 16y                    | 116                              | 123                                | 239                                     | 85                                     | 82                                       | 167                                     | 170                                   | 576                      |
