# Supplementary material for: Genetic and Environmental Contributions to Weight, Height, and BMI from Birth to 19 Years of Age: An International Study of Over 12,000 Twin Pairs
Source: PubMed Central journal article supplement (PMC3275599; doi:10.1371/journal.pone.0030153), 2012-02-08
Supplement: pone.0030153.s003.pdf [file pone.0030153.s003.pdf]

**Table S3: Mean and Standard Error of height (m) in MZ and DZ twins of four countries, from birth through 19 years of age**

| Age (Cohorts)            | MZ Twins |      |       |       |      |       |       |      |       | DZ Twins |      |       |       |      |       |              |      |       | All Twins |      |       |       |      |       |
|--------------------------|----------|------|-------|-------|------|-------|-------|------|-------|----------|------|-------|-------|------|-------|--------------|------|-------|-----------|------|-------|-------|------|-------|
|                          | Boys     |      |       | Girls |      |       | Total |      |       | Boys     |      |       | Girls |      |       | Opposite-sex |      |       | Total     |      |       | Total |      |       |
|                          | N        | Mean | SE    | N     | Mean | SE    | N     | Mean | SE    | N        | Mean | SE    | N     | Mean | SE    | N            | Mean | SE    | N         | Mean | SE    | N     | Mean | SE    |
| Birth (All cohorts)      | 3159     | 0.47 | 0.001 | 3126  | 0.47 | 0.001 | 6285  | 0.47 | 0.000 | 4788     | 0.48 | 0.000 | 4578  | 0.48 | 0.000 | 8385         | 0.48 | 0.000 | 17751     | 0.48 | 0.000 | 24036 | 0.48 | 0.000 |
| 5 mos (QNTS)             | 110      | 0.65 | 0.002 | 136   | 0.63 | 0.002 | 246   | 0.64 | 0.002 | 102      | 0.65 | 0.002 | 96    | 0.63 | 0.003 | 162          | 0.64 | 0.002 | 360       | 0.64 | 0.001 | 606   | 0.64 | 0.001 |
| 3y (DTR)                 | 106      | 0.98 | 0.004 | 130   | 0.98 | 0.004 | 236   | 0.98 | 0.003 | 340      | 0.98 | 0.002 | 312   | 0.96 | 0.003 | 600          | 0.97 | 0.002 | 1252      | 0.97 | 0.001 | 1488  | 0.97 | 0.001 |
| 4y (DTR)                 | 114      | 1.05 | 0.005 | 128   | 1.05 | 0.004 | 242   | 1.05 | 0.003 | 362      | 1.05 | 0.003 | 342   | 1.05 | 0.003 | 572          | 1.05 | 0.002 | 1276      | 1.05 | 0.001 | 1518  | 1.05 | 0.001 |
| 5y (DTR & QNTS))         | 298      | 1.10 | 0.003 | 284   | 1.10 | 0.003 | 582   | 1.10 | 0.002 | 486      | 1.12 | 0.002 | 404   | 1.11 | 0.003 | 798          | 1.12 | 0.002 | 1688      | 1.12 | 0.001 | 2270  | 1.11 | 0.001 |
| 6y (DTR)                 | 152      | 1.19 | 0.005 | 114   | 1.18 | 0.005 | 266   | 1.18 | 0.003 | 330      | 1.19 | 0.003 | 278   | 1.18 | 0.003 | 508          | 1.19 | 0.002 | 1116      | 1.19 | 0.002 | 1382  | 1.19 | 0.002 |
| 7y (DTR)                 | 118      | 1.25 | 0.006 | 120   | 1.24 | 0.006 | 238   | 1.24 | 0.004 | 304      | 1.25 | 0.003 | 296   | 1.25 | 0.004 | 576          | 1.25 | 0.003 | 1176      | 1.25 | 0.002 | 1414  | 1.25 | 0.002 |
| 8y (DTR, QNTS, & TCHAD)  | 594      | 1.33 | 0.003 | 628   | 1.32 | 0.003 | 1222  | 1.32 | 0.002 | 676      | 1.33 | 0.002 | 610   | 1.32 | 0.003 | 1246         | 1.32 | 0.002 | 2532      | 1.32 | 0.001 | 3754  | 1.32 | 0.001 |
| 9y (CATSS & DTR)         | 270      | 1.36 | 0.004 | 244   | 1.35 | 0.004 | 514   | 1.35 | 0.003 | 456      | 1.38 | 0.003 | 414   | 1.36 | 0.003 | 844          | 1.36 | 0.002 | 1714      | 1.37 | 0.002 | 2228  | 1.36 | 0.001 |
| 10y (DTR)                | 120      | 1.41 | 0.006 | 90    | 1.41 | 0.007 | 210   | 1.41 | 0.005 | 242      | 1.44 | 0.004 | 278   | 1.41 | 0.004 | 424          | 1.43 | 0.003 | 944       | 1.42 | 0.002 | 1154  | 1.42 | 0.002 |
| 11y (DTR)                | 88       | 1.49 | 0.008 | 108   | 1.47 | 0.008 | 196   | 1.48 | 0.006 | 234      | 1.49 | 0.005 | 222   | 1.48 | 0.005 | 340          | 1.48 | 0.004 | 796       | 1.48 | 0.003 | 992   | 1.48 | 0.003 |
| 12y (CATSS, DTR, & BTLS) | 520      | 1.51 | 0.003 | 510   | 1.52 | 0.003 | 1030  | 1.52 | 0.002 | 628      | 1.52 | 0.003 | 594   | 1.53 | 0.003 | 1110         | 1.52 | 0.002 | 2332      | 1.52 | 0.002 | 3362  | 1.52 | 0.001 |
| 13y (DTR & TCHAD)        | 394      | 1.63 | 0.004 | 384   | 1.61 | 0.004 | 778   | 1.62 | 0.003 | 382      | 1.63 | 0.004 | 424   | 1.61 | 0.004 | 708          | 1.61 | 0.003 | 1514      | 1.62 | 0.002 | 2292  | 1.62 | 0.002 |
| 14y (DTR & BTLS)         | 346      | 1.66 | 0.004 | 352   | 1.61 | 0.004 | 698   | 1.63 | 0.003 | 392      | 1.66 | 0.004 | 404   | 1.63 | 0.004 | 624          | 1.64 | 0.003 | 1420      | 1.64 | 0.002 | 2118  | 1.64 | 0.002 |
| 15y (DTR)                | 86       | 1.73 | 0.008 | 82    | 1.64 | 0.008 | 168   | 1.69 | 0.006 | 186      | 1.74 | 0.006 | 174   | 1.66 | 0.006 | 228          | 1.71 | 0.005 | 588       | 1.71 | 0.003 | 756   | 1.70 | 0.003 |
| 16y (DTR, BTLS, & TCHAD) | 678      | 1.76 | 0.003 | 710   | 1.64 | 0.003 | 1388  | 1.70 | 0.002 | 554      | 1.77 | 0.003 | 552   | 1.66 | 0.003 | 1078         | 1.71 | 0.002 | 2184      | 1.71 | 0.002 | 3572  | 1.71 | 0.002 |
| 17y (DTR)                | 62       | 1.81 | 0.009 | 62    | 1.67 | 0.009 | 124   | 1.74 | 0.008 | 124      | 1.80 | 0.007 | 144   | 1.68 | 0.006 | 144          | 1.74 | 0.006 | 412       | 1.74 | 0.004 | 536   | 1.74 | 0.004 |
| 18y (DTR)                | 72       | 1.80 | 0.009 | 74    | 1.69 | 0.009 | 146   | 1.75 | 0.008 | 90       | 1.81 | 0.008 | 92    | 1.67 | 0.008 | 130          | 1.75 | 0.007 | 312       | 1.75 | 0.005 | 458   | 1.75 | 0.004 |
| 19y (DTR)                | 48       | 1.84 | 0.011 | 52    | 1.68 | 0.010 | 100   | 1.75 | 0.009 | 72       | 1.81 | 0.009 | 88    | 1.69 | 0.008 | 148          | 1.74 | 0.006 | 308       | 1.74 | 0.005 | 408   | 1.75 | 0.005 |
