# Supplementary material for: Genetic and Environmental Contributions to Weight, Height, and BMI from Birth to 19 Years of Age: An International Study of Over 12,000 Twin Pairs
Source: PubMed Central journal article supplement (PMC3275599; doi:10.1371/journal.pone.0030153), 2012-02-08
Supplement: pone.0030153.s004.pdf [file pone.0030153.s004.pdf]

**Table S4: Mean and Standard Error of BMI (kg/m<sup>2</sup>) in MZ and DZ twins of four countries, from birth through 19 years of age.**

| Age (Cohorts)            | MZ Twins |       |      |       |       |      |       |       |      | DZ Twins |       |      |       |       |      |              |       |      | All Twins |       |      |       |       |      |
|--------------------------|----------|-------|------|-------|-------|------|-------|-------|------|----------|-------|------|-------|-------|------|--------------|-------|------|-----------|-------|------|-------|-------|------|
|                          | Boys     |       |      | Girls |       |      | Total |       |      | Boys     |       |      | Girls |       |      | Opposite-sex |       |      | Total     |       |      | Total |       |      |
|                          | N        | Mean  | SE   | N     | Mean  | SE   | N     | Mean  | SE   | N        | Mean  | SE   | N     | Mean  | SE   | N            | Mean  | SE   | N         | Mean  | SE   | N     | Mean  | SE   |
| Birth (All cohorts)      | 3159     | 11.33 | 0.03 | 3126  | 11.27 | 0.03 | 6285  | 11.30 | 0.02 | 4788     | 11.32 | 0.02 | 4578  | 11.25 | 0.02 | 8385         | 11.39 | 0.02 | 17751     | 11.34 | 0.01 | 24036 | 11.33 | 0.01 |
| 5 mos (QNTS)             | 110      | 18.46 | 0.17 | 136   | 17.79 | 0.15 | 246   | 18.09 | 0.11 | 102      | 18.44 | 0.17 | 96    | 17.59 | 0.18 | 162          | 17.99 | 0.14 | 360       | 18.01 | 0.09 | 606   | 18.04 | 0.07 |
| 3y (DTR)                 | 106      | 15.79 | 0.15 | 130   | 15.69 | 0.13 | 236   | 15.74 | 0.10 | 340      | 15.90 | 0.08 | 312   | 15.60 | 0.09 | 600          | 15.78 | 0.06 | 1252      | 15.77 | 0.04 | 1488  | 15.76 | 0.04 |
| 4y (DTR)                 | 114      | 15.68 | 0.13 | 128   | 15.43 | 0.12 | 242   | 15.55 | 0.09 | 362      | 15.53 | 0.07 | 342   | 15.38 | 0.08 | 572          | 15.43 | 0.06 | 1276      | 15.45 | 0.04 | 1518  | 15.46 | 0.04 |
| 5y (DTR & QNTS))         | 298      | 15.50 | 0.09 | 284   | 15.39 | 0.09 | 582   | 15.45 | 0.06 | 486      | 15.62 | 0.07 | 404   | 15.32 | 0.08 | 798          | 15.35 | 0.06 | 1688      | 15.42 | 0.04 | 2270  | 15.43 | 0.03 |
| 6y (DTR)                 | 152      | 15.37 | 0.13 | 114   | 15.31 | 0.15 | 266   | 15.34 | 0.10 | 330      | 15.33 | 0.09 | 278   | 15.41 | 0.09 | 508          | 15.41 | 0.07 | 1116      | 15.39 | 0.05 | 1382  | 15.38 | 0.04 |
| 7y (DTR)                 | 118      | 15.51 | 0.18 | 120   | 15.75 | 0.17 | 238   | 15.63 | 0.12 | 304      | 15.51 | 0.11 | 296   | 15.65 | 0.11 | 576          | 15.45 | 0.08 | 1176      | 15.52 | 0.06 | 1414  | 15.54 | 0.05 |
| 8y (DTR, QNTS, & TCHAD)  | 594      | 16.31 | 0.09 | 628   | 16.19 | 0.09 | 1222  | 16.25 | 0.06 | 676      | 16.30 | 0.08 | 610   | 16.43 | 0.09 | 1246         | 16.31 | 0.06 | 2532      | 16.33 | 0.04 | 3754  | 16.31 | 0.04 |
| 9y (CATSS & DTR)         | 270      | 16.70 | 0.14 | 244   | 16.43 | 0.14 | 514   | 16.57 | 0.10 | 456      | 16.51 | 0.11 | 414   | 16.70 | 0.11 | 844          | 16.60 | 0.08 | 1714      | 16.60 | 0.05 | 2228  | 16.59 | 0.05 |
| 10y (DTR)                | 120      | 16.77 | 0.21 | 90    | 16.70 | 0.24 | 210   | 16.74 | 0.16 | 242      | 17.34 | 0.14 | 278   | 16.97 | 0.13 | 424          | 16.83 | 0.11 | 944       | 17.00 | 0.07 | 1154  | 16.95 | 0.07 |
| 11y (DTR)                | 88       | 16.74 | 0.25 | 108   | 17.09 | 0.23 | 196   | 16.93 | 0.17 | 234      | 17.25 | 0.15 | 222   | 17.39 | 0.16 | 340          | 17.21 | 0.13 | 796       | 17.27 | 0.08 | 992   | 17.20 | 0.07 |
| 12y (CATSS, DTR, & BTLS) | 520      | 18.18 | 0.13 | 510   | 18.64 | 0.13 | 1030  | 18.41 | 0.09 | 628      | 18.47 | 0.12 | 594   | 18.43 | 0.12 | 1110         | 18.15 | 0.09 | 2332      | 18.31 | 0.06 | 3362  | 18.34 | 0.05 |
| 13y (DTR & TCHAD)        | 394      | 18.62 | 0.13 | 384   | 18.96 | 0.13 | 778   | 18.79 | 0.09 | 382      | 19.32 | 0.14 | 424   | 18.82 | 0.13 | 708          | 19.07 | 0.10 | 1514      | 19.06 | 0.07 | 2292  | 18.97 | 0.06 |
| 14y (DTR & BTLS)         | 346      | 19.53 | 0.17 | 352   | 20.21 | 0.17 | 698   | 19.87 | 0.12 | 392      | 19.85 | 0.16 | 404   | 19.86 | 0.16 | 624          | 20.33 | 0.13 | 1420      | 20.06 | 0.09 | 2118  | 20.00 | 0.07 |
| 15y (DTR)                | 86       | 19.45 | 0.31 | 82    | 20.39 | 0.32 | 168   | 19.91 | 0.22 | 186      | 19.90 | 0.21 | 174   | 20.28 | 0.22 | 228          | 20.21 | 0.19 | 588       | 20.13 | 0.12 | 756   | 20.08 | 0.10 |
| 16y (DTR, BTLS, & TCHAD) | 678      | 21.13 | 0.13 | 710   | 20.79 | 0.13 | 1388  | 20.96 | 0.09 | 554      | 21.32 | 0.14 | 552   | 21.16 | 0.14 | 1078         | 21.44 | 0.10 | 2184      | 21.34 | 0.07 | 3572  | 21.19 | 0.06 |
| 17y (DTR)                | 62       | 21.30 | 0.37 | 62    | 20.71 | 0.37 | 124   | 21.00 | 0.27 | 124      | 21.84 | 0.26 | 144   | 21.01 | 0.25 | 144          | 21.23 | 0.25 | 412       | 21.34 | 0.15 | 536   | 21.26 | 0.13 |
| 18y (DTR)                | 72       | 21.28 | 0.40 | 74    | 22.05 | 0.39 | 146   | 21.67 | 0.28 | 90       | 22.43 | 0.36 | 92    | 21.18 | 0.35 | 130          | 21.71 | 0.30 | 312       | 21.76 | 0.19 | 458   | 21.73 | 0.16 |
| 19y (DTR)                | 48       | 22.14 | 0.42 | 52    | 21.53 | 0.41 | 100   | 21.83 | 0.30 | 72       | 23.05 | 0.35 | 88    | 21.24 | 0.31 | 148          | 22.58 | 0.24 | 308       | 22.31 | 0.17 | 408   | 22.19 | 0.15 |
