# Supplementary material for: Genetic and Environmental Contributions to Weight, Height, and BMI from Birth to 19 Years of Age: An International Study of Over 12,000 Twin Pairs
Source: PubMed Central journal article supplement (PMC3275599; doi:10.1371/journal.pone.0030153), 2012-02-08
Supplement: pone.0030153.s005.pdf [file pone.0030153.s005.pdf]

**Table S5: Intra-class correlations (ICC) between MZ and DZ twin pairs for mean weight (kg), height (m), and BMI (kg/m<sup>2</sup>), from birth through 19 years of age.**

| ICC for Weight (kg)      |                    |                    |                    |                    |                    |              |                    |
|--------------------------|--------------------|--------------------|--------------------|--------------------|--------------------|--------------|--------------------|
| Age (Cohorts)            | MZ Twins           |                    |                    | DZ Twins           |                    |              |                    |
|                          | Boys               | Girls              | Total              | Boys               | Girls              | Opposite-sex | Total              |
| Birth (All cohorts)      | 0.833 <sup>a</sup> | 0.821 <sup>b</sup> | 0.828 <sup>c</sup> | 0.725 <sup>a</sup> | 0.752 <sup>b</sup> | 0.695        | 0.719 <sup>c</sup> |
| 5 mos (QNTS)             | 0.883 <sup>a</sup> | 0.886 <sup>b</sup> | 0.899 <sup>c</sup> | 0.600 <sup>a</sup> | 0.439 <sup>b</sup> | 0.385        | 0.503 <sup>c</sup> |
| 3y (DTR)                 | 0.927 <sup>a</sup> | 0.951 <sup>b</sup> | 0.942 <sup>c</sup> | 0.625 <sup>a</sup> | 0.528 <sup>b</sup> | 0.312        | 0.443 <sup>c</sup> |
| 4y (DTR)                 | 0.906 <sup>a</sup> | 0.903 <sup>b</sup> | 0.905 <sup>c</sup> | 0.521 <sup>a</sup> | 0.554 <sup>b</sup> | 0.534        | 0.538 <sup>c</sup> |
| 5y (DTR & QNTS))         | 0.927 <sup>a</sup> | 0.860 <sup>b</sup> | 0.896 <sup>c</sup> | 0.441 <sup>a</sup> | 0.413 <sup>b</sup> | 0.491        | 0.465 <sup>c</sup> |
| 6y (DTR)                 | 0.910 <sup>a</sup> | 0.941 <sup>b</sup> | 0.923 <sup>c</sup> | 0.506 <sup>a</sup> | 0.680 <sup>b</sup> | 0.434        | 0.508 <sup>c</sup> |
| 7y (DTR)                 | 0.886 <sup>a</sup> | 0.931 <sup>b</sup> | 0.913 <sup>c</sup> | 0.556 <sup>a</sup> | 0.655 <sup>b</sup> | 0.523        | 0.570 <sup>c</sup> |
| 8y (DTR, QNTS, & TCHAD)  | 0.860 <sup>a</sup> | 0.901 <sup>b</sup> | 0.883 <sup>c</sup> | 0.519 <sup>a</sup> | 0.459 <sup>b</sup> | 0.482        | 0.484 <sup>c</sup> |
| 9y (CATSS & DTR)         | 0.893 <sup>a</sup> | 0.869 <sup>b</sup> | 0.884 <sup>c</sup> | 0.519 <sup>a</sup> | 0.548 <sup>b</sup> | 0.365        | 0.457 <sup>c</sup> |
| 10y (DTR)                | 0.911 <sup>a</sup> | 0.907 <sup>b</sup> | 0.911 <sup>c</sup> | 0.229 <sup>a</sup> | 0.439 <sup>b</sup> | 0.479        | 0.408 <sup>c</sup> |
| 11y (DTR)                | 0.928 <sup>a</sup> | 0.960 <sup>b</sup> | 0.952 <sup>c</sup> | 0.555 <sup>a</sup> | 0.561 <sup>b</sup> | 0.356        | 0.482 <sup>c</sup> |
| 12y (CATSS, DTR, & BTLS) | 0.889 <sup>a</sup> | 0.917 <sup>b</sup> | 0.905 <sup>c</sup> | 0.362 <sup>a</sup> | 0.490 <sup>b</sup> | 0.427        | 0.427 <sup>c</sup> |
| 13y (DTR & TCHAD)        | 0.914 <sup>a</sup> | 0.909 <sup>b</sup> | 0.912 <sup>c</sup> | 0.599 <sup>a</sup> | 0.554 <sup>b</sup> | 0.433        | 0.515 <sup>c</sup> |
| 14y (DTR & BTLS)         | 0.865 <sup>a</sup> | 0.925 <sup>b</sup> | 0.899 <sup>c</sup> | 0.380 <sup>a</sup> | 0.368 <sup>b</sup> | 0.347        | 0.368 <sup>c</sup> |
| 15y (DTR)                | 0.905 <sup>a</sup> | 0.897 <sup>b</sup> | 0.904 <sup>c</sup> | 0.551 <sup>a</sup> | 0.606 <sup>b</sup> | 0.237        | 0.460 <sup>c</sup> |
| 16y (DTR, BTLS, & TCHAD) | 0.837 <sup>a</sup> | 0.871 <sup>b</sup> | 0.874 <sup>c</sup> | 0.490 <sup>a</sup> | 0.383 <sup>b</sup> | 0.164        | 0.340 <sup>c</sup> |
| 17y (DTR)                | 0.919 <sup>a</sup> | 0.949 <sup>b</sup> | 0.948 <sup>c</sup> | 0.126 <sup>a</sup> | 0.465 <sup>b</sup> | 0.000        | 0.253 <sup>c</sup> |
| 18y (DTR)                | 0.808 <sup>a</sup> | 0.939 <sup>b</sup> | 0.923 <sup>c</sup> | 0.340 <sup>a</sup> | 0.567 <sup>b</sup> | 0.000        | 0.293 <sup>c</sup> |
| 19y (DTR)                | 0.748 <sup>a</sup> | 0.876 <sup>b</sup> | 0.886 <sup>c</sup> | 0.022 <sup>a</sup> | 0.372 <sup>b</sup> | 0.000        | 0.227 <sup>c</sup> |

<sup>a, b, c</sup> Significant difference ( $p \leq 0.05$ ) in the ICC between MZ and DZ twins of the same sex (or in both sexes combined)

| ICC for Height (m)       |                    |                    |                    |                    |                    |              |                    |
|--------------------------|--------------------|--------------------|--------------------|--------------------|--------------------|--------------|--------------------|
| Age (Cohorts)            | MZ Twins           |                    |                    | DZ Twins           |                    |              |                    |
|                          | Boys               | Girls              | Total              | Boys               | Girls              | Opposite-sex | Total              |
| Birth (All cohorts)      | 0.876 <sup>a</sup> | 0.862 <sup>b</sup> | 0.870 <sup>c</sup> | 0.788 <sup>a</sup> | 0.777 <sup>b</sup> | 0.739        | 0.763 <sup>c</sup> |
| 5 mos (QNTS)             | 0.770              | 0.772              | 0.799 <sup>c</sup> | 0.585              | 0.626              | 0.567        | 0.599 <sup>c</sup> |
| 3y (DTR)                 | 0.968 <sup>a</sup> | 0.946 <sup>b</sup> | 0.954 <sup>c</sup> | 0.673 <sup>a</sup> | 0.643 <sup>b</sup> | 0.616        | 0.642 <sup>c</sup> |
| 4y (DTR)                 | 0.959 <sup>a</sup> | 0.974 <sup>b</sup> | 0.967 <sup>c</sup> | 0.675 <sup>a</sup> | 0.681 <sup>b</sup> | 0.678        | 0.678 <sup>c</sup> |
| 5y (DTR & QNTS))         | 0.930 <sup>a</sup> | 0.938 <sup>b</sup> | 0.934 <sup>c</sup> | 0.689 <sup>a</sup> | 0.541 <sup>b</sup> | 0.655        | 0.640 <sup>c</sup> |
| 6y (DTR)                 | 0.970 <sup>a</sup> | 0.977 <sup>b</sup> | 0.974 <sup>c</sup> | 0.638 <sup>a</sup> | 0.591 <sup>b</sup> | 0.604        | 0.614 <sup>c</sup> |
| 7y (DTR)                 | 0.961 <sup>a</sup> | 0.970 <sup>b</sup> | 0.966 <sup>c</sup> | 0.602 <sup>a</sup> | 0.629 <sup>b</sup> | 0.627        | 0.623 <sup>c</sup> |
| 8y (DTR, QNTS, & TCHAD)  | 0.931 <sup>a</sup> | 0.940 <sup>b</sup> | 0.936 <sup>c</sup> | 0.643 <sup>a</sup> | 0.648 <sup>b</sup> | 0.626        | 0.637 <sup>c</sup> |
| 9y (CATSS & DTR)         | 0.902 <sup>a</sup> | 0.911 <sup>b</sup> | 0.906 <sup>c</sup> | 0.571 <sup>a</sup> | 0.652 <sup>b</sup> | 0.528        | 0.575 <sup>c</sup> |
| 10y (DTR)                | 0.965 <sup>a</sup> | 0.917 <sup>b</sup> | 0.951 <sup>c</sup> | 0.530 <sup>a</sup> | 0.542 <sup>b</sup> | 0.504        | 0.532 <sup>c</sup> |
| 11y (DTR)                | 0.969 <sup>a</sup> | 0.981 <sup>b</sup> | 0.980 <sup>c</sup> | 0.631 <sup>a</sup> | 0.634 <sup>b</sup> | 0.505        | 0.586 <sup>c</sup> |
| 12y (CATSS, DTR, & BTLS) | 0.890 <sup>a</sup> | 0.917 <sup>b</sup> | 0.905 <sup>c</sup> | 0.493 <sup>a</sup> | 0.588 <sup>b</sup> | 0.497        | 0.523 <sup>c</sup> |
| 13y (DTR & TCHAD)        | 0.933 <sup>a</sup> | 0.925 <sup>b</sup> | 0.932 <sup>c</sup> | 0.549 <sup>a</sup> | 0.565 <sup>b</sup> | 0.422        | 0.504 <sup>c</sup> |
| 14y (DTR & BTLS)         | 0.931 <sup>a</sup> | 0.913 <sup>b</sup> | 0.931 <sup>c</sup> | 0.498 <sup>a</sup> | 0.565 <sup>b</sup> | 0.310        | 0.445 <sup>c</sup> |
| 15y (DTR)                | 0.960 <sup>a</sup> | 0.948 <sup>b</sup> | 0.966 <sup>c</sup> | 0.514 <sup>a</sup> | 0.458 <sup>b</sup> | 0.000        | 0.396 <sup>c</sup> |
| 16y (DTR, BTLS, & TCHAD) | 0.794 <sup>a</sup> | 0.813 <sup>b</sup> | 0.878 <sup>c</sup> | 0.354 <sup>a</sup> | 0.421 <sup>b</sup> | 0.000        | 0.254 <sup>c</sup> |
| 17y (DTR)                | 0.954 <sup>a</sup> | 0.948 <sup>b</sup> | 0.976 <sup>c</sup> | 0.484 <sup>a</sup> | 0.570 <sup>b</sup> | 0.000        | 0.367 <sup>c</sup> |
| 18y (DTR)                | 0.875 <sup>a</sup> | 0.958 <sup>b</sup> | 0.952 <sup>c</sup> | 0.549 <sup>a</sup> | 0.454 <sup>b</sup> | 0.000        | 0.280 <sup>c</sup> |
| 19y (DTR)                | 0.860 <sup>a</sup> | 0.900 <sup>b</sup> | 0.950 <sup>c</sup> | 0.182 <sup>a</sup> | 0.575 <sup>b</sup> | 0.000        | 0.273 <sup>c</sup> |

<sup>a, b, c</sup> Significant difference ( $p \leq 0.05$ ) in the ICC between MZ and DZ twins of the same sex (or in both sexes combined)

ICC for BMI (kg/m<sup>2</sup>)

| Age (Cohorts)            | MZ Twins           |                    |                    | DZ Twins           |                    |              |                    |
|--------------------------|--------------------|--------------------|--------------------|--------------------|--------------------|--------------|--------------------|
|                          | Boys               | Girls              | Total              | Boys               | Girls              | Opposite-sex | Total              |
| Birth (All cohorts)      | 0.728 <sup>a</sup> | 0.752 <sup>b</sup> | 0.741 <sup>c</sup> | 0.603 <sup>a</sup> | 0.627 <sup>b</sup> | 0.577        | 0.597 <sup>c</sup> |
| 5 mos (QNTS)             | 0.836 <sup>a</sup> | 0.844 <sup>b</sup> | 0.846 <sup>c</sup> | 0.532 <sup>a</sup> | 0.455 <sup>b</sup> | 0.318        | 0.436 <sup>c</sup> |
| 3y (DTR)                 | 0.883 <sup>a</sup> | 0.906 <sup>b</sup> | 0.897 <sup>c</sup> | 0.584 <sup>a</sup> | 0.639 <sup>b</sup> | 0.225        | 0.403 <sup>c</sup> |
| 4y (DTR)                 | 0.874 <sup>a</sup> | 0.900 <sup>b</sup> | 0.890 <sup>c</sup> | 0.621 <sup>a</sup> | 0.481 <sup>b</sup> | 0.538        | 0.545 <sup>c</sup> |
| 5y (DTR & QNTS))         | 0.888 <sup>a</sup> | 0.675 <sup>b</sup> | 0.782 <sup>c</sup> | 0.421 <sup>a</sup> | 0.445 <sup>b</sup> | 0.520        | 0.474 <sup>c</sup> |
| 6y (DTR)                 | 0.887 <sup>a</sup> | 0.883 <sup>b</sup> | 0.886 <sup>c</sup> | 0.287 <sup>a</sup> | 0.770 <sup>b</sup> | 0.397        | 0.476 <sup>c</sup> |
| 7y (DTR)                 | 0.813 <sup>a</sup> | 0.907 <sup>b</sup> | 0.868 <sup>c</sup> | 0.583 <sup>a</sup> | 0.577 <sup>b</sup> | 0.647        | 0.617 <sup>c</sup> |
| 8y (DTR, QNTS, & TCHAD)  | 0.810 <sup>a</sup> | 0.883 <sup>b</sup> | 0.853 <sup>c</sup> | 0.523 <sup>a</sup> | 0.419 <sup>b</sup> | 0.453        | 0.460 <sup>c</sup> |
| 9y (CATSS & DTR)         | 0.884 <sup>a</sup> | 0.848 <sup>b</sup> | 0.870 <sup>c</sup> | 0.493 <sup>a</sup> | 0.467 <sup>b</sup> | 0.406        | 0.444 <sup>c</sup> |
| 10y (DTR)                | 0.858 <sup>a</sup> | 0.869 <sup>b</sup> | 0.863 <sup>c</sup> | 0.098 <sup>a</sup> | 0.466 <sup>b</sup> | 0.369        | 0.329 <sup>c</sup> |
| 11y (DTR)                | 0.899 <sup>a</sup> | 0.913 <sup>b</sup> | 0.910 <sup>c</sup> | 0.631 <sup>a</sup> | 0.571 <sup>b</sup> | 0.344        | 0.502 <sup>c</sup> |
| 12y (CATSS, DTR, & BTLS) | 0.862 <sup>a</sup> | 0.895 <sup>b</sup> | 0.881 <sup>c</sup> | 0.378 <sup>a</sup> | 0.479 <sup>b</sup> | 0.462        | 0.442 <sup>c</sup> |
| 13y (DTR & TCHAD)        | 0.862 <sup>a</sup> | 0.898 <sup>b</sup> | 0.884 <sup>c</sup> | 0.567 <sup>a</sup> | 0.508 <sup>b</sup> | 0.399        | 0.479 <sup>c</sup> |
| 14y (DTR & BTLS)         | 0.826 <sup>a</sup> | 0.903 <sup>b</sup> | 0.878 <sup>c</sup> | 0.381 <sup>a</sup> | 0.406 <sup>b</sup> | 0.402        | 0.401 <sup>c</sup> |
| 15y (DTR)                | 0.857 <sup>a</sup> | 0.921 <sup>b</sup> | 0.904 <sup>c</sup> | 0.513 <sup>a</sup> | 0.654 <sup>b</sup> | 0.276        | 0.487 <sup>c</sup> |
| 16y (DTR, BTLS, & TCHAD) | 0.729 <sup>a</sup> | 0.834 <sup>b</sup> | 0.779 <sup>c</sup> | 0.242 <sup>a</sup> | 0.393 <sup>b</sup> | 0.320        | 0.316 <sup>c</sup> |
| 17y (DTR)                | 0.873 <sup>a</sup> | 0.937 <sup>b</sup> | 0.915 <sup>c</sup> | 0.057 <sup>a</sup> | 0.477 <sup>b</sup> | 0.000        | 0.157 <sup>c</sup> |
| 18y (DTR)                | 0.727 <sup>a</sup> | 0.944 <sup>b</sup> | 0.922 <sup>c</sup> | 0.259 <sup>a</sup> | 0.536 <sup>b</sup> | 0.220        | 0.350 <sup>c</sup> |
| 19y (DTR)                | 0.769 <sup>a</sup> | 0.793 <sup>b</sup> | 0.789 <sup>c</sup> | 0.067 <sup>a</sup> | 0.355 <sup>b</sup> | 0.276        | 0.294 <sup>c</sup> |

<sup>a, b, c</sup> Significant difference ( $p \leq 0.05$ ) in the ICC between MZ and DZ twins of the same sex (or in both sexes combined)
