# Supplementary material for: Genetic and Environmental Contributions to Weight, Height, and BMI from Birth to 19 Years of Age: An International Study of Over 12,000 Twin Pairs
Source: PLoS One. 2012 Feb 8;7(2):e30153. doi: 10.1371/journal.pone.0030153 (PMC3275599; doi:10.1371/journal.pone.0030153)
Supplement: Table S2 — Mean and Standard Error of weight (kg) in MZ and DZ twins of four countries, from birth through 19 years of age. (PDF) [file pone.0030153.s002.pdf]

**Table S2: Mean and Standard Error of weight (kg) in MZ and DZ twins of four countries, from birth through 19 years of age.**

| Age (Cohorts)            | MZ Twins |      |      |       |      |      |       |      |      | DZ Twins |      |      |       |      |      |              |      |      | All Twins |      |      |       |      |      |
|--------------------------|----------|------|------|-------|------|------|-------|------|------|----------|------|------|-------|------|------|--------------|------|------|-----------|------|------|-------|------|------|
|                          | Boys     |      |      | Girls |      |      | Total |      |      | Boys     |      |      | Girls |      |      | Opposite-sex |      |      | Total     |      |      | Total |      |      |
|                          | N        | Mean | SE   | N     | Mean | SE   | N     | Mean | SE   | N        | Mean | SE   | N     | Mean | SE   | N            | Mean | SE   | N         | Mean | SE   | N     | Mean | SE   |
| Birth (All cohorts)      | 3159     | 2.6  | 0.01 | 3126  | 2.5  | 0.01 | 6285  | 2.5  | 0.01 | 4788     | 2.6  | 0.01 | 4578  | 2.6  | 0.01 | 8385         | 2.6  | 0.01 | 17751     | 2.6  | 0.00 | 24036 | 2.6  | 0.00 |
| 5 mos (QNTS)             | 110      | 7.8  | 0.09 | 136   | 7.1  | 0.08 | 246   | 7.4  | 0.06 | 102      | 7.7  | 0.09 | 96    | 7.1  | 0.09 | 162          | 7.4  | 0.07 | 360       | 7.4  | 0.05 | 606   | 7.4  | 0.04 |
| 3y (DTR)                 | 106      | 15.1 | 0.19 | 130   | 15.2 | 0.17 | 236   | 15.2 | 0.13 | 340      | 15.2 | 0.11 | 312   | 14.5 | 0.11 | 600          | 14.8 | 0.08 | 1252      | 14.8 | 0.06 | 1488  | 14.9 | 0.05 |
| 4y (DTR)                 | 114      | 17.2 | 0.21 | 128   | 17.0 | 0.20 | 242   | 17.1 | 0.14 | 362      | 17.2 | 0.12 | 342   | 16.9 | 0.12 | 572          | 17.0 | 0.09 | 1276      | 17.0 | 0.06 | 1518  | 17.0 | 0.06 |
| 5y (DTR & QNTS))         | 298      | 19.0 | 0.16 | 284   | 18.8 | 0.16 | 582   | 18.9 | 0.12 | 486      | 19.8 | 0.13 | 404   | 19.0 | 0.14 | 798          | 19.1 | 0.10 | 1688      | 19.3 | 0.07 | 2270  | 19.2 | 0.06 |
| 6y (DTR)                 | 152      | 21.8 | 0.26 | 114   | 21.3 | 0.30 | 266   | 21.6 | 0.20 | 330      | 21.9 | 0.18 | 278   | 21.6 | 0.19 | 508          | 21.8 | 0.14 | 1116      | 21.8 | 0.10 | 1382  | 21.8 | 0.09 |
| 7y (DTR)                 | 118      | 24.2 | 0.36 | 120   | 24.4 | 0.36 | 238   | 24.3 | 0.26 | 304      | 24.3 | 0.23 | 296   | 24.4 | 0.23 | 576          | 24.3 | 0.16 | 1176      | 24.3 | 0.12 | 1414  | 24.3 | 0.10 |
| 8y (DTR, QNTS, & TCHAD)  | 594      | 28.9 | 0.22 | 628   | 28.2 | 0.21 | 1222  | 28.5 | 0.15 | 676      | 28.8 | 0.20 | 610   | 28.7 | 0.22 | 1246         | 28.5 | 0.15 | 2532      | 28.6 | 0.11 | 3754  | 28.6 | 0.09 |
| 9y (CATSS & DTR)         | 270      | 30.8 | 0.34 | 244   | 30.0 | 0.35 | 514   | 30.4 | 0.24 | 456      | 31.4 | 0.26 | 414   | 31.0 | 0.27 | 844          | 31.0 | 0.19 | 1714      | 31.1 | 0.13 | 2228  | 30.9 | 0.12 |
| 10y (DTR)                | 120      | 33.7 | 0.58 | 90    | 33.5 | 0.68 | 210   | 33.6 | 0.44 | 242      | 35.9 | 0.41 | 278   | 34.0 | 0.38 | 424          | 34.5 | 0.31 | 944       | 34.7 | 0.21 | 1154  | 34.5 | 0.19 |
| 11y (DTR)                | 88       | 37.1 | 0.74 | 108   | 37.3 | 0.67 | 196   | 37.2 | 0.50 | 234      | 38.2 | 0.46 | 222   | 38.3 | 0.47 | 340          | 37.8 | 0.38 | 796       | 38.1 | 0.25 | 992   | 37.9 | 0.22 |
| 12y (CATSS, DTR, & BTLS) | 520      | 41.7 | 0.40 | 510   | 43.5 | 0.40 | 1030  | 42.6 | 0.28 | 628      | 42.8 | 0.36 | 594   | 43.5 | 0.37 | 1110         | 42.3 | 0.27 | 2332      | 42.7 | 0.19 | 3362  | 42.7 | 0.16 |
| 13y (DTR & TCHAD)        | 394      | 49.7 | 0.46 | 384   | 49.1 | 0.46 | 778   | 49.4 | 0.33 | 382      | 51.7 | 0.47 | 424   | 48.8 | 0.44 | 708          | 49.9 | 0.34 | 1514      | 50.1 | 0.24 | 2292  | 49.8 | 0.19 |
| 14y (DTR & BTLS)         | 346      | 53.9 | 0.58 | 352   | 52.5 | 0.57 | 698   | 53.1 | 0.41 | 392      | 55.3 | 0.54 | 404   | 53.0 | 0.54 | 624          | 54.9 | 0.43 | 1420      | 54.5 | 0.29 | 2118  | 54.0 | 0.23 |
| 15y (DTR)                | 86       | 58.5 | 1.03 | 82    | 55.0 | 1.06 | 168   | 56.8 | 0.75 | 186      | 60.2 | 0.70 | 174   | 56.0 | 0.72 | 228          | 59.6 | 0.63 | 588       | 58.7 | 0.40 | 756   | 58.3 | 0.35 |
| 16y (DTR, BTLS, & TCHAD) | 678      | 65.3 | 0.42 | 710   | 56.3 | 0.41 | 1388  | 60.7 | 0.31 | 554      | 66.7 | 0.46 | 552   | 58.3 | 0.46 | 1078         | 62.7 | 0.33 | 2184      | 62.6 | 0.25 | 3572  | 61.9 | 0.19 |
| 17y (DTR)                | 62       | 69.9 | 1.38 | 62    | 58.0 | 1.38 | 124   | 64.0 | 1.07 | 124      | 70.5 | 0.98 | 144   | 59.1 | 0.91 | 144          | 64.7 | 0.91 | 412       | 64.5 | 0.59 | 536   | 64.4 | 0.51 |
| 18y (DTR)                | 72       | 69.2 | 1.44 | 74    | 63.0 | 1.42 | 146   | 66.1 | 1.09 | 90       | 73.9 | 1.29 | 92    | 59.3 | 1.28 | 130          | 67.3 | 1.07 | 312       | 66.9 | 0.75 | 458   | 66.6 | 0.61 |
| 19y (DTR)                | 48       | 74.8 | 1.57 | 52    | 60.8 | 1.50 | 100   | 67.5 | 1.23 | 72       | 75.8 | 1.28 | 88    | 60.8 | 1.16 | 148          | 68.9 | 0.89 | 308       | 68.2 | 0.70 | 408   | 68.0 | 0.61 |
